# Supplementary material for: Brain functional networks associated with social bonding in monogamous voles
Source: eLife. 2021 Jan 14;10:e55081. doi: 10.7554/eLife.55081 (PMC7847304; doi:10.7554/eLife.55081)
Supplement: Figure 2—source data 1. [file elife-55081-fig2-data1.xlsx]

## Sheet: Hoja1
Subject	Sub_number	Sex	Session	Huddling_lat	Huddling_demeaned	LS - MeA	ACC - NAcc	BLA - NAcc	BLA - RSC	PVN - RSC	MeA - VP	LS - VTA	RSC - VTA	BLA - Dent
F01s01	1	F	1	21.2	-52.8154	0.187069	-0.120491	-0.00287946	0.185145	0.159255	0.0326681	0.038471	-0.254194	0.295295
F02s01	2	F	1	25.58	-48.4354	-0.0491382	-0.0473553	0.142084	0.0819376	-0.0964151	0.042337	0.26166	0.000893516	0.0625336
F04s01	4	F	1	44.54	-29.4754	0.0580039	-0.0911789	0.0592234	-0.035225	0.0254867	-0.060203	0.046071	-0.0872573	0.164433
F05s01	5	F	1	135	60.9846	-0.0924797	-0.230277	-0.0569598	-0.223579	-0.0770165	0.0106393	-0.178712	-0.289798	-0.0373098
F06s01	6	F	1	34.35	-39.6654	0.0304884	-0.0983862	0.0537392	0.0204489	-0.155033	0.117347	-0.123662	0.0443331	-0.0964939
F07s01	7	F	1	59.05	-14.9654	0.19715	-0.206153	-0.0888218	-0.0385097	0.151944	0.0943045	0.118975	-0.21998	-0.00326537
F08s01	8	F	1	264.1	190.085	-0.102607	-0.166269	-0.0847968	-0.183557	-0.0501702	0.00479227	-0.127476	-0.324011	-0.137827
F10s01	10	F	1	72.2	-1.81536	-0.0265808	0.16666	-0.0250696	-0.158809	-0.0569528	-0.215998	-0.13361	0.0232762	0.0384544
F11s01	11	F	1	116.41	42.3946	-0.200615	-0.0442087	0.0143785	-0.0608508	0.0174553	-0.0749856	0.0420267	-0.205685	-0.411776
F12s01	12	F	1	26.18	-47.8354	0.0573409	-0.0893523	0.262082	0.146126	-0.0583838	0.182596	0.120218	-0.117125	0.0148562
F13s01	13	F	1	41.56	-32.4554	-0.0677724	-0.164506	0.0849596	-0.0364303	-0.102839	-0.0572717	-0.0716912	-0.099653	-0.0580676
F15s01	15	F	1	73.51	-0.505357	0.082457	0.0562385	0.0579781	0.122293	-0.0792448	-0.0761006	0.0953574	-0.0431423	0.0911173
F17s01	17	F	1	106.16	32.1446	-0.138765	-0.103298	0.0508778	-0.217076	0.108872	-0.00674609	-0.0945664	-0.371498	-0.163486
F18s01	18	F	1	24.25	-49.7654	-0.0111105	0.211598	-0.045617	0.225208	0.139042	0.0171188	-0.0166126	0.106508	0.263613
M01s01	1	M	1	21.2	-52.8154	0.169472	0.0829256	0.191862	0.0226608	0.0509777	0.187437	0.087201	-0.0321649	-0.164112
M02s01	2	M	1	25.58	-48.4354	0.0130484	0.0338121	0.184831	0.0319112	-0.0131759	0.0735274	0.0683	-0.0843151	0.0949189
M04s01	4	M	1	44.54	-29.4754	0.021233	-0.063988	0.00181831	-0.295365	0.124377	0.032389	0.0619851	-0.195496	-0.124706
M05s01	5	M	1	135	60.9846	0.0970101	-0.149595	-0.104967	-0.232884	-0.0408313	-0.109683	-0.03898	-0.0832272	0.0446069
M06s01	6	M	1	34.35	-39.6654	-0.205923	-0.0878566	-0.101238	0.045394	0.0483111	-0.0187843	0.115399	-0.000826726	-0.0567506
M07s01	7	M	1	59.05	-14.9654	0.0750472	-0.184215	-0.0058023	-0.0478386	0.100181	-0.0880507	0.0868629	0.0294729	-0.00378406
M08s01	8	M	1	264.1	190.085	-0.17131	-0.212107	-0.256426	0.0288397	-0.141492	-0.214779	-0.109937	-0.340957	-0.142815
M10s01	10	M	1	56.45	-17.5654	0.00170655	-0.157477	-0.158283	-0.176579	-0.0430656	-0.145607	-0.0298893	0.0988714	-0.0754419
M11s01	11	M	1	116.41	42.3946	0.0201371	-0.0427372	0.00583728	0.00407121	-0.0955326	0.0274962	-0.159873	-0.113526	0.0368804
M12s01	12	M	1	26.18	-47.8354	0.0783003	0.0463277	0.131028	-0.109167	0.226497	0.252958	0.291533	0.0540004	0.056578
M13s01	13	M	1	41.56	-32.4554	-0.217702	0.222446	-0.0736557	-0.191026	0.0826446	0.206285	0.0351208	0.108991	0.0838978
M15s01	15	M	1	73.51	-0.505357	-0.0788724	-0.0295391	0.0249844	-0.0798821	-0.0380355	0.0923129	-0.173522	-0.0572584	-0.0358874
M17s01	17	M	1	106.16	32.1446	-0.0133317	0.0545213	-0.226322	-0.167141	0.106994	-0.0920232	-0.0165627	-0.291482	-0.116978
M18s01	18	M	1	24.25	-49.7654	-0.0693768	-0.119317	-0.0729918	0.0814486	0.113794	0.0273741	-0.0901393	-0.234909	-0.00833542
