# Supplementary material for: Brain functional networks associated with social bonding in monogamous voles
Source: eLife. 2021 Jan 14;10:e55081. doi: 10.7554/eLife.55081 (PMC7847304; doi:10.7554/eLife.55081)
Supplement: Figure 4—source data 1. [file elife-55081-fig4-data1.xlsx]

## Sheet: Hoja1
Subject	Sub_number	Sex	Session	Total_time	Total_Socialtime	Percentage_socialtime	Socialtime_demeaned	FC_MeA.mPFC	FC_LS.NAcc	FC_mPFC.NAcc	FC_MeA.VP	FC_MOB.VP	FC_MOB.DG
F01s02	1	F	2	180	150.03	83.35	3.65508	-0.113214	0.155814	-0.158619	0.0432369	-0.304152	-0.0211886
F02s02	2	F	2	180	115.5	64.1667	-15.5283	-0.0974211	0.325392	0.132251	0.0307672	-0.059426	0.135442
F04s02	4	F	2	180	157.23	87.35	7.65508	0.116047	-0.00103349	0.0117412	0.0655912	0.300539	-0.113888
F05s02	5	F	2	180	173.15	96.1944	16.4995	-0.0547325	-0.0410235	0.125246	-0.0662551	-0.11889	-0.185414
F06s02	6	F	2	180	144.64	80.3556	0.660638	0.0670323	-0.312782	-0.151316	0.173226	-0.192041	0.090733
F07s02	7	F	2	180	176.44	98.0222	18.3273	-0.168826	-0.0877966	-0.176651	0.0805568	-0.12608	0.0952132
F08s02	8	F	2	114.7	63.75	55.5798	-24.1151	0.0163774	0.105902	0.0856076	-0.131695	0.021667	-0.0855484
F09s02	9	F	2	180	165.85	92.1389	12.444	0.140525	-0.0191825	0.32977	-0.083315	-0.131213	-0.0798595
F10Bs02	10B	F	2	180	76.15	42.3056	-9.71492	-0.163743	0.222032	-0.0910489	0.154583	0.0949446	-0.0212069
F10s02	10	F	2	180	125.97	69.9833	-37.4849	0.0526264	-0.0591748	0.0792637	0.0243882	0.324868	0.326379
F11s02	11	F	2	180	128.7	71.5	-8.19492	-0.0634192	0.161946	-0.00281705	0.139821	-0.0252364	-0.144911
F12s02	12	F	2	180	145.61	80.8944	1.19953	0.0406687	0.0983905	0.0628439	-0.0466649	-0.000879996	0.219355
F13s02	13	F	2	180	142.91	79.3944	-0.300473	-0.126366	0.200952	0.0465917	0.101274	0.0115615	0.0153274
F15s02	15	F	2	180	161.73	89.85	10.1551	-0.218022	-0.173301	-0.0115926	-0.138084	0.12973	-0.0369676
F17s02	17	F	2	180	128.62	71.4556	-8.23936	0.158752	-0.0242163	-0.153603	0.0261133	0.0373109	0.105552
F18s02	18	F	2	180	147.35	81.8611	2.16619	0.205953	-0.0848359	0.0594382	0.00406452	0.127297	-0.0978138
M01s02	1	M	2	180	118.66	65.9222	-13.7727	0.039525	0.173669	-0.049995	0.142718	0.278847	0.154327
M02s02	2	M	2	150.65	107.87	71.6031	-8.09186	0.0369156	-0.0663866	-0.326473	-0.0425627	-0.0667158	0.196535
M04s02	4	M	2	180	158.63	88.1278	8.43286	-0.0102262	-0.0430044	0.0406354	-0.103218	-0.0794022	0.293488
M05s02	5	M	2	180	61.12	33.9556	-45.7394	0.0418758	0.0847278	0.444269	0.146821	0.193662	0.197769
M06s02	6	M	2	180	168.32	93.5111	13.8162	-0.151414	-0.0994523	0.0600138	-0.0942643	-0.175156	0.109277
M07s02	7	M	2	180	165.52	91.9556	12.2606	-0.189775	-0.0685782	0.195855	-0.128439	-0.0792575	-0.119023
M08s02	8	M	2	180	145.27	80.7056	1.01064	-0.0400948	-0.0946357	-0.122112	0.000691676	-0.017679	0.0454373
M09s02	9	M	2	180	162.2	90.1111	10.4162	0.0182993	-0.110066	-0.194417	-0.00850849	-0.0713339	0.20468
M10Bs02	10B	M	2	180	152.6	84.7778	5.08508	-0.207269	-0.104868	-0.00182885	0.0534857	-0.0317733	-0.0879212
M10s02	10	M	2	180	168.73	93.7389	14.0451	-0.113599	0.00164311	-0.092555	-0.0500515	-0.203737	0.0757494
M11s02	11	M	2	180	165.24	91.8	12.1051	-0.185345	0.0955276	-0.198534	-0.0217034	-0.134181	-0.0691435
M12s02	12	M	2	180	142.32	79.0667	-0.628251	-0.10526	0.300635	0.180927	-0.0664723	0.0129773	-0.141314
M13s02	13	M	2	152.08	140.86	92.6223	12.9274	-0.175853	-0.238461	-0.0834214	-0.0543705	0.111869	-0.204449
M15s02	15	M	2	180	130.77	72.65	-7.04492	0.162464	0.0151854	-0.0584787	-0.10372	0.194739	0.0338803
M17s02	17	M	2	180	157.43	87.4611	7.76619	-0.215841	0.080165	-0.171334	-0.0383382	-0.0942515	0.0130551
M18s02	18	M	2	180	158.26	87.9222	8.2273	-0.164609	-0.152596	0.0611239	-0.0503785	0.0887867	-0.0252204
