# Supplementary material for: Brain functional networks associated with social bonding in monogamous voles
Source: eLife. 2021 Jan 14;10:e55081. doi: 10.7554/eLife.55081 (PMC7847304; doi:10.7554/eLife.55081)
Supplement: Figure 5—source data 1. — NA: data not available. [file elife-55081-fig5-data1.csv]

Sex	Ses	id	Y	FC_ACC.LS	FC_LS.mPFC	FC_BLA.NAcc	FC_LS.RSC	FC_LS.VP	FC_NAcc.VTA	FC_VP.VTA	FC_LS.HipD	FC_mPFC.HipD	FC_ACC.HipV
F	1	F01	0.304621795	0.020111136	0.161606945	-0.00287946	0.05390331	0.022395418	0.099051823	-0.166476956	0.070830955	-0.01129138	0.304621795
F	1	F02	0.16854431	0.210335712	-0.097114925	0.142083618	0.024340378	-0.124638822	-0.078337368	-0.054275767	0.060396237	0.174970386	0.16854431
F	1	F04	-0.13206664	0.250256963	-0.030544928	0.059223419	-0.166188516	-0.010890189	0.221679596	-0.092974363	0.164025824	0.162151347	-0.13206664
F	1	F05	-0.04752019	0.181310153	0.108434815	-0.056959844	-0.139200749	-0.118975305	0.254692505	-0.088181381	0.007384396	-0.193122451	-0.04752019
F	1	F06	0.096059977	0.449795344	-0.123558652	0.053739236	-0.152021062	0.245062767	-0.033825035	0.095365019	-0.045928892	0.176530519	0.096059977
F	1	F07	-0.002351372	0.130090881	0.024615397	-0.088821789	-0.095686534	-0.092091141	0.055530503	-0.038542237	-0.000245207	0.296153274	-0.002351372
F	1	F08	0.156029001	-0.112640533	0.286048174	-0.084796808	-0.173496192	0.247853998	0.035688217	-0.046653224	0.16594341	0.052096291	0.156029001
F	1	F09	NA	NA	NA	NA	NA	NA	NA	NA	NA	NA	NA
F	1	F10	0.044673629	0.153650368	-0.134799707	-0.025069573	0.070019682	0.075412289	0.138932275	-0.016249662	0.100451261	0.024976928	0.044673629
F	1	F10B	NA	NA	NA	NA	NA	NA	NA	NA	NA	NA	NA
F	1	F11	-0.069936402	0.05517812	0.109874997	0.014378479	0.029348915	-0.099733516	0.17458473	-0.110906441	0.023291405	0.0257756	-0.069936402
F	1	F12	0.103882512	-0.198235968	0.150418925	0.262082399	0.066764973	-0.187320665	0.181600712	-0.102089157	0.276574331	0.208336332	0.103882512
F	1	F13	0.089977201	0.167982694	-0.025803331	0.084959576	-0.0145573	-0.009835757	0.202454357	-0.102290938	-0.109870781	0.132975873	0.089977201
F	1	F15	-0.158636964	-0.006567464	0.068656665	0.057978127	0.124551314	-0.029980481	-0.092377903	0.184844744	0.128278259	0.217339798	-0.158636964
F	1	F17	0.164387226	0.09415713	0.068305191	0.050877772	0.005427221	0.084190535	0.074619538	-0.158520072	0.046827435	0.26708613	0.164387226
F	1	F18	-0.262261784	0.217249777	0.103555532	-0.045616987	0.005397359	0.138363451	0.259100759	-0.102651228	0.209900136	0.296413494	-0.262261784
M	1	M01	-0.035424209	0.015939666	-0.038420525	0.191862	-0.090934612	0.078040892	0.08171555	-0.023607772	0.137750729	0.21207093	-0.035424209
M	1	M02	-0.016536513	0.107674877	0.085479073	0.184831036	0.094453179	-0.047705256	0.094171466	-0.004555803	-0.028127529	0.09655873	-0.016536513
M	1	M04	-0.134161447	0.184503034	0.133392114	0.001818308	-0.182120836	0.083331211	0.093130635	-0.062373522	0.010395246	0.000740018	-0.134161447
M	1	M05	-0.047645117	-0.197062822	-0.035103461	-0.104967189	0.050082685	-0.05209951	-0.015075474	0.05062905	0.264268145	-0.039212056	-0.047645117
M	1	M06	-0.041115059	-0.078896417	-0.028004653	-0.101238191	0.013912476	0.140100315	0.19375892	-0.29270113	0.142168889	0.06788253	-0.041115059
M	1	M07	0.065057502	-0.048347769	0.162589938	-0.005802302	0.220829417	-0.147264207	0.040438819	-0.015176812	0.010383196	0.079304102	0.065057502
M	1	M08	0.137115667	0.35928374	0.011249294	-0.256426307	-0.159871595	-0.201296726	-0.10091154	0.093524661	0.056750106	0.081262913	0.137115667
M	1	M09	NA	NA	NA	NA	NA	NA	NA	NA	NA	NA	NA
M	1	M10	0.085911162	0.146204147	0.04632799	-0.158282979	-0.020854844	0.126144892	-0.09341871	0.104392681	-0.000959936	0.032140572	0.085911162
M	1	M10B	NA	NA	NA	NA	NA	NA	NA	NA	NA	NA	NA
M	1	M11	0.024126153	0.215738407	0.155312726	0.005837279	0.147486861	-0.039626692	-0.07037752	-0.064911542	-0.090945658	0.223555927	0.024126153
M	1	M12	-0.312827133	-0.123415603	0.065631023	0.131028026	0.057460846	0.095057026	0.06001145	-0.110551395	0.197969837	-0.043015853	-0.312827133
M	1	M13	0.141620714	0.069898156	0.155877989	-0.073655739	-0.135322763	0.053507803	-0.100367532	0.112300615	0.079623626	0.139317868	0.141620714
M	1	M15	-0.201619487	-2.05E-05	0.186398722	0.024984371	-0.19163961	-0.059746116	-0.021560804	-0.050002078	0.102063633	0.338737105	-0.201619487
M	1	M17	-0.139439652	0.031586447	0.162715981	-0.226321751	-0.142839752	0.078877605	0.0047707	-0.026263223	-0.052183073	0.354686044	-0.139439652
M	1	M18	-0.125963567	0.117852779	0.092498553	-0.072991805	-0.199186757	-0.082661557	0.197708765	-0.179343868	0.11338968	0.421681726	-0.125963567
F	2	F01	-0.025701341	0.149310704	-0.12687313	-0.04353888	0.091194279	0.001765179	0.22457003	-0.177209159	0.116610297	0.099092023	-0.025701341
F	2	F02	0.130541296	0.01756518	-0.01730807	0.091124181	0.065903144	-0.039544305	-0.198639421	0.086921293	-0.153692138	0.046339646	0.130541296
F	2	F04	0.02215266	0.447023789	-0.043247413	0.075106242	-0.125991305	0.08341567	0.066779797	-0.13022752	0.126926718	0.123019362	0.02215266
F	2	F05	0.154929714	-0.044090888	0.22416643	0.046465388	-0.063758253	0.230005271	0.07641499	-0.023447694	-0.120885161	0.256886618	0.154929714
F	2	F06	0.152435554	0.056562462	-0.003265088	-0.002041662	-0.050958873	0.198351796	-0.017879728	0.000389018	0.229745742	0.104600148	0.152435554
F	2	F07	0.120427169	0.140058026	0.032842101	-0.025685709	0.210669416	0.16329159	-0.055127301	0.008542287	-0.175194431	0.071681731	0.120427169
F	2	F08	0.181981851	0.211843434	0.001158014	0.12514143	-0.148578206	0.208143563	-0.20664395	0.253615528	0.008705843	0.007335822	0.181981851
F	2	F09	0.096729611	0.066428211	0.044871167	-0.030847476	0.077950273	0.066775413	-0.224232286	0.155143457	-0.020173972	0.159489322	0.096729611
F	2	F10	0.112559846	0.188150503	0.029043185	-0.062583788	-0.175835285	0.221243195	-0.130172882	0.025053902	-0.047967104	0.130593916	0.112559846
F	2	F10B	-0.07487109	-0.24963051	0.225998556	0.092948715	-0.051598849	-0.24358462	0.084328188	0.022618279	0.135600888	0.179247959	-0.07487109
F	2	F11	0.135308161	-0.140105506	0.151259455	0.108729228	0.245539642	-0.098770152	0.169801081	-0.033402889	0.115264843	-0.019738476	0.135308161
F	2	F12	0.016984905	0.226382417	0.221841702	-0.037741896	-0.050450998	0.000214542	0.160184094	-0.160996156	-0.181474053	0.231178886	0.016984905
F	2	F13	0.133002691	0.352300657	0.068111224	0.175646097	-0.039419872	0.013051484	-0.054916271	0.21507264	-0.300696062	0.178517675	0.133002691
F	2	F15	0.127697146	-0.148947801	-0.106254726	0.050994497	0.221781106	0.09940421	0.034951982	0.047309522	-0.153193658	0.272882702	0.127697146
F	2	F17	0.181647673	0.094627907	0.087611017	-0.080336172	-0.008318923	0.066224491	-0.00177833	-0.077176328	0.133657923	0.1675519	0.181647673
F	2	F18	-0.1444813	-0.112246554	0.093802014	-0.024483453	0.058210688	0.208204817	0.216525595	-0.071896603	0.073944535	0.059934981	-0.1444813
M	2	M01	0.035088434	0.214471734	-0.068071392	0.033944693	0.222323685	-0.053079133	-0.090328354	0.157048039	-0.101426805	0.327544234	0.035088434
M	2	M02	0.063109287	0.287414059	-0.038927744	-0.09087491	-0.0715956	0.13537775	-0.047116659	-0.08528576	-0.157280412	0.201477897	0.063109287
M	2	M04	-0.016678226	-0.059174889	0.10720717	-0.053777348	-0.009198341	0.063056267	0.030461184	-0.084520925	0.165713173	-0.005257101	-0.016678226
M	2	M05	-0.049000144	-0.055294527	-0.029026533	-0.118433279	0.104482089	0.106171305	-0.029910676	-0.042464529	0.093773657	0.077410928	-0.049000144
M	2	M06	0.068387953	0.14919913	-0.042289201	0.133132733	0.030020204	0.258496077	0.275008576	-0.302451751	-0.128420763	0.099370139	0.068387953
M	2	M07	0.157504765	0.006561228	0.170488947	-0.138764439	0.138864181	0.072761901	0.010135296	-0.179992755	0.098250858	-0.017870478	0.157504765
M	2	M08	0.182980084	0.12514606	0.060259468	0.199129303	0.349763182	0.093320187	-0.08417361	0.143585168	-0.066809507	-0.115844233	0.182980084
M	2	M09	0.19677549	0.240069026	-0.114962647	0.108653209	0.105915609	0.249686391	-0.100824121	-0.032047999	0.103463404	-0.045720267	0.19677549
M	2	M10	0.032564352	0.246124558	-0.119457481	-0.111693855	0.363770747	-0.025108341	0.044492106	-0.168945755	-0.1019447	0.050500329	0.032564352
M	2	M10B	-0.055318602	-0.142301951	0.016125261	0.14845128	0.179510922	0.05996205	-0.071493207	0.014211238	-0.009783585	0.026009723	-0.055318602
M	2	M11	-0.144410828	0.007310208	0.367019377	0.188479154	0.422109069	-0.077303487	0.034823499	-0.007093473	-0.049455108	0.331946613	-0.144410828
M	2	M12	-0.274624576	0.150596055	-0.107822369	0.140330196	-0.009253538	-0.194820521	-0.323039974	0.396124466	0.018279187	-0.063145331	-0.274624576
M	2	M13	0.368676337	0.05318612	-0.053099199	0.050071658	0.13365179	0.19409622	0.203729605	-0.157554982	-0.071868487	0.269923538	0.368676337
M	2	M15	-0.048447808	0.121041794	0.066089825	-0.116271128	0.172913398	0.073566859	-0.001418992	0.079066165	-0.024745398	0.250953541	-0.048447808
M	2	M17	0.058826667	-0.007584112	0.068647468	0.020494691	-0.072334057	0.081983984	0.015917984	-0.049247791	0.151622569	-0.099810741	0.058826667
M	2	M18	0.173850338	0.084304066	0.094406386	0.112247172	0.005930963	0.178003627	-0.195310933	0.142571869	-0.106339191	0.170769679	0.173850338
F	3	F01	0.247779247	-0.222351362	0.163663783	0.00442677	0.03036839	-0.084877948	0.187351913	-0.247393764	-0.010308002	0.105164968	0.247779247
F	3	F02	NA	NA	NA	NA	NA	NA	NA	NA	NA	NA	NA
F	3	F04	0.153514991	0.05441796	0.058365263	-0.048536078	0.048181151	0.280694101	0.126620596	-0.111118441	0.189124547	0.295325234	0.153514991
F	3	F05	-0.186101662	-0.380591011	0.178953269	-0.038990602	-0.216114344	0.216127753	0.08327014	-0.16237016	-0.063326749	0.24052695	-0.186101662
F	3	F06	0.005981554	0.170723392	0.240739431	0.080785601	-0.246859217	0.128670797	0.115394983	0.006322957	0.067767163	0.072515968	0.005981554
F	3	F07	-0.226637475	-0.111032933	0.284856861	-0.008371634	-0.082588645	-0.039901066	-0.072127157	0.149471709	0.020519103	0.313048662	-0.226637475
F	3	F08	-0.103755338	-0.080972486	0.107141311	0.096179797	0.061308161	0.023350338	0.059078198	-0.048635951	0.07337681	0.054040774	-0.103755338
F	3	F09	0.033900381	0.089831701	0.127757541	0.064920091	0.103377789	0.089506051	-0.005259922	0.018784653	0.024429622	0.347113981	0.033900381
F	3	F10	-0.115809992	-0.039055505	0.34588084	-0.003430098	-0.029594362	0.043165198	-0.133470701	0.040243273	-0.083120467	0.221375689	-0.115809992
F	3	F10B	0.07456243	-0.312569144	0.309530617	0.065917605	-0.102671884	-0.10904044	-0.239527655	0.271424846	0.081296404	0.263644997	0.07456243
F	3	F11	-0.088098919	-0.077006003	0.207911789	-0.174892162	0.367924965	-0.131735476	0.027731531	-0.106043768	0.05963597	0.098500842	-0.088098919
F	3	F12	-0.048216227	0.027761992	0.245834801	0.081483904	0.063224742	-0.046600334	-0.141979886	0.160742418	-0.055457018	0.069172893	-0.048216227
F	3	F13	0.137865751	-0.076136313	0.105064521	-0.124566949	0.095126933	-0.27639937	0.107326074	0.012479212	0.253122788	0.24210239	0.137865751
F	3	F15	0.027718051	0.112266675	0.08180349	-0.244318744	0.050834031	0.124089416	-0.043890927	0.275727295	-0.012328949	0.1882924	0.027718051
F	3	F17	0.023935237	-0.01220724	0.087048963	-0.029117052	0.153467675	0.00555271	-0.025572339	-0.078854178	-0.019999128	0.206148675	0.023935237
F	3	F18	-0.056867307	0.040451969	0.060226403	-0.209483918	-0.121785156	-0.014022393	0.074011946	-0.058447672	0.089190564	-0.019137243	-0.056867307
M	3	M01	-0.003271041	0.092461752	-0.087819724	-0.081134401	-0.044024893	0.069452896	0.20618736	0.074810408	-0.069639767	0.119104256	-0.003271041
M	3	M02	NA	NA	NA	NA	NA	NA	NA	NA	NA	NA	NA
M	3	M04	0.182366029	-0.018278442	0.184970743	0.060583736	0.006750118	0.076369322	0.0287018	-0.221867974	0.088057243	-0.031427106	0.182366029
M	3	M05	-0.099648721	-0.125287403	0.125020693	-0.280529242	-0.075902605	-0.011297163	-0.213804698	-0.004009237	0.134795531	0.236126364	-0.099648721
M	3	M06	0.076465295	0.059375081	0.112225094	-0.276094487	0.241386141	0.241465525	0.231662978	-0.156840208	-0.1744028	0.336146885	0.076465295
M	3	M07	0.128526913	0.065690951	-0.037943737	-0.038955897	0.056792538	0.099543547	0.024449576	0.091282639	0.092120581	0.300271925	0.128526913
M	3	M08	0.09309174	-0.089181244	0.216777894	0.167925987	-0.070056495	0.115711812	0.153815405	-0.001397978	0.362031375	-0.006118453	0.09309174
M	3	M09	0.08320436	0.322854216	0.041873643	-0.029293432	0.053295759	0.111663691	-0.099323686	0.059065288	-0.084724859	0.082588465	0.08320436
M	3	M10	-0.094027863	-0.123166301	0.276585415	0.032504747	-0.19311078	-0.059980274	-0.078213425	0.138476392	0.211960965	-0.06283316	-0.094027863
M	3	M10B	0.094152703	-0.206847911	0.287791234	-0.109572159	0.345652372	-0.100699889	-0.039423992	-0.108320446	-0.077492127	0.401471052	0.094152703
M	3	M11	-0.056027554	-0.044926017	0.033235958	-0.089707063	0.192783679	-0.119408054	-0.209342549	0.140080319	0.100729676	0.357780942	-0.056027554
M	3	M12	-0.229105563	-0.132709538	0.110440461	-0.155307131	0.191459504	-0.014477208	-0.082347845	-0.149192556	-0.026008269	-0.042130759	-0.229105563
M	3	M13	-0.021495225	-0.036732999	0.079396332	-0.068848088	-0.059203462	-0.099061504	-0.088336755	0.185486615	0.143071343	0.18607978	-0.021495225
M	3	M15	0.005104817	-0.012823273	0.248268734	0.001057298	-0.246225724	0.078579987	-0.194010971	0.169520715	-0.073449208	0.327775345	0.005104817
M	3	M17	-0.075750384	0.03388012	-0.012230051	0.006566251	0.170989827	0.130294484	-0.075767842	0.113206903	-0.039117645	0.122631702	-0.075750384
M	3	M18	-0.025505484	-0.020990354	0.282023337	0.091739347	-0.064225121	0.003740516	-0.161104423	0.004630027	0.030629848	0.2079782	-0.025505484
