# Supplementary material for: Brain functional networks associated with social bonding in monogamous voles
Source: eLife. 2021 Jan 14;10:e55081. doi: 10.7554/eLife.55081 (PMC7847304; doi:10.7554/eLife.55081)
Supplement: Figure 6—source data 1. [file elife-55081-fig6-data1.xlsx]

## Sheet: s01
Subject	Sub_number	Sex	Session	Index_Pref	Index_demeaned	FC_LS.VP
F01s01	1	F	1	0.56	-0.002	0.0223954
F02s01	2	F	1	0.31	-0.252	-0.124639
F04s01	4	F	1	0.21	-0.352	-0.0108902
F05s01	5	F	1	0.5	-0.062	-0.118975
F06s01	6	F	1	0.64	0.078	0.245063
F07s01	7	F	1	0.77	0.208	-0.0920911
F08s01	8	F	1	0.62	0.058	0.247854
F10s01	10	F	1	0.84	0.278	0.0754123
F11s01	11	F	1	0.08	-0.482	-0.0997335
F12s01	12	F	1	0.3	-0.262	-0.187321
F13s01	13	F	1	0.65	0.088	-0.00983576
F15s01	15	F	1	0.18	-0.382	-0.0299805
F17s01	17	F	1	0.87	0.308	0.0841905
F18s01	18	F	1	0.69	0.128	0.138363
M01s01	1	M	1	0.48	-0.082	0.0780409
M02s01	2	M	1	0.68	0.118	-0.0477053
M04s01	4	M	1	0.78	0.218	0.0833312
M05s01	5	M	1	0.79	0.228	-0.0520995
M06s01	6	M	1	0.81	0.248	0.1401
M07s01	7	M	1	0.34	-0.222	-0.147264
M08s01	8	M	1	0.16	-0.402	-0.201297
M10s01	10	M	1	0.9	0.338	0.126145
M11s01	11	M	1	0.72	0.158	-0.0396267
M12s01	12	M	1	0.09	-0.472	0.095057
M13s01	13	M	1	0.78	0.218	0.0535078
M15s01	15	M	1	0.85	0.288	-0.0597461
M17s01	17	M	1	0.57	0.008	0.0788776
M18s01	18	M	1	0.56	-0.002	-0.0826616

## Sheet: s02
Subject	Sub_number	Sex	Session	Index_Pref	Index_demeaned	FC_BLA.NAcc
F01s02	1	F	2	0.56	0.001	-0.0435389
F02s02	2	F	2	0.31	-0.249	0.0911242
F04s02	4	F	2	0.21	-0.349	0.0751062
F05s02	5	F	2	0.5	-0.059	0.0464654
F06s02	6	F	2	0.64	0.081	-0.00204166
F07s02	7	F	2	0.77	0.211	-0.0256857
F08s02	8	F	2	0.62	0.061	0.125141
F09s02	9	F	2	0.85	0.291	-0.0308475
F10Bs02	10B	F	2	0.77	0.211	0.0929487
F10s02	10	F	2	0.84	0.281	-0.0625838
F11s02	11	F	2	0.08	-0.479	0.108729
F12s02	12	F	2	0.3	-0.259	-0.0377419
F13s02	13	F	2	0.65	0.091	0.175646
F15s02	15	F	2	0.18	-0.379	0.0509945
F17s02	17	F	2	0.87	0.311	-0.0803362
F18s02	18	F	2	0.69	0.131	-0.0244835
M01s02	1	M	2	0.48	-0.079	0.0339447
M02s02	2	M	2	0.68	0.121	-0.0908749
M04s02	4	M	2	0.78	0.221	-0.0537773
M05s02	5	M	2	0.79	0.231	-0.118433
M06s02	6	M	2	0.81	0.251	0.133133
M07s02	7	M	2	0.34	-0.219	-0.138764
M08s02	8	M	2	0.16	-0.399	0.199129
M09s02	9	M	2	0.5	-0.059	0.108653
M10Bs02	10B	M	2	0.04	-0.519	0.148451
M10s02	10	M	2	0.9	0.341	-0.111694
M11s02	11	M	2	0.72	0.161	0.188479
M12s02	12	M	2	0.09	-0.469	0.14033
M13s02	13	M	2	0.78	0.221	0.0500717
M15s02	15	M	2	0.85	0.291	-0.116271
M17s02	17	M	2	0.57	0.011	0.0204947
M18s02	18	M	2	0.56	0.001	0.112247

## Sheet: s03
Subject	Sub_number	Sex	Session	Index_Pref	Index_demeaned	FC_LS.RSC
F01s03	1	F	3	0.56	-0.003	0.0303684
F04s03	4	F	3	0.21	-0.353	0.0481812
F05s03	5	F	3	0.5	-0.063	-0.216114
F06s03	6	F	3	0.64	0.077	-0.246859
F07s03	7	F	3	0.77	0.207	-0.0825886
F08s03	8	F	3	0.62	0.057	0.0613082
F09s03	9	F	3	0.85	0.287	0.103378
F10Bs03	10B	F	3	0.77	0.207	-0.102672
F10s03	10	F	3	0.84	0.277	-0.0295944
F11s03	11	F	3	0.08	-0.483	0.367925
F12s03	12	F	3	0.3	-0.263	0.0632247
F13s03	13	F	3	0.65	0.087	0.0951269
F15s03	15	F	3	0.18	-0.383	0.050834
F17s02	17	F	3	0.87	0.307	0.153468
F18s03	18	F	3	0.69	0.127	-0.121785
M01s03	1	M	3	0.48	-0.083	-0.0440249
M04s03	4	M	3	0.78	0.217	0.00675012
M05s03	5	M	3	0.79	0.227	-0.0759026
M06s03	6	M	3	0.81	0.247	0.241386
M07s03	7	M	3	0.34	-0.223	0.0567925
M08s03	8	M	3	0.16	-0.403	-0.0700565
M09s03	9	M	3	0.5	-0.063	0.0532958
M10Bs03	10B	M	3	0.04	-0.523	0.345652
M10s03	10	M	3	0.9	0.337	-0.193111
M11s03	11	M	3	0.72	0.157	0.192784
M12s03	12	M	3	0.09	-0.473	0.19146
M13s03	13	M	3	0.78	0.217	-0.0592035
M15s03	15	M	3	0.85	0.287	-0.246226
M17s03	17	M	3	0.57	0.007	0.17099
M18s03	18	M	3	0.56	-0.003	-0.0642251
